# Supplementary material for: Genetic Structure of Wild and Cultivated Olives in the Central Mediterranean Basin
Source: Oxford University Press journal article supplement (doi:10.1093/aob/mcl178), 2006-08-25
Supplement: mcl178Supplementary_material.pdf [file mcl178Supplementary_material.pdf]

## SUPPLEMENTARY MATERIAL

## List of genotypes analysed

---

| Genotype/region/site | Genotype name           |
|----------------------|-------------------------|
| Cultivar/Umbria      | Agello 106              |
| Cultivar/Umbria      | Agello 108              |
| Cultivar/Umbria      | Agello 109              |
| Cultivar/Umbria      | Agello 111              |
| Cultivar/Umbria      | Agello 112              |
| Cultivar/Umbria      | Agello Case Sparse 152  |
| Cultivar/Umbria      | Agello Case Sparse 153  |
| Cultivar/Umbria      | Agello Case Sparse 154  |
| Cultivar/Umbria      | Agogia Grande           |
| Cultivar/Umbria      | Agogia Piccola          |
| Cultivar/Umbria      | Assisi U1               |
| Cultivar/Umbria      | Assisi U3               |
| Cultivar/Umbria      | Assisi U8               |
| Cultivar/Umbria      | Bianchella di Umbertide |
| Cultivar/Umbria      | Bianchella Zocco        |
| Cultivar/Umbria      | Borgiona                |
| Cultivar/Umbria      | Caste Poreta 2          |
| Cultivar/Umbria      | Castello poreta 1       |

|                 |                               |
|-----------------|-------------------------------|
| Cultivar/Umbria | Castello Poreta 4             |
| Cultivar/Umbria | Castello Poreta 5             |
| Cultivar/Umbria | Castello Poreta 6             |
| Cultivar/Umbria | Cimignolo                     |
| Cultivar/Umbria | Comignolo Giallo              |
| Cultivar/Umbria | Corciano 150                  |
| Cultivar/Umbria | Corniolo                      |
| Cultivar/Umbria | Coroncina Umbra               |
| Cultivar/Umbria | Correggiolo dei Monti Martani |
| Cultivar/Umbria | Dolce Agogia                  |
| Cultivar/Umbria | Dura Zocco                    |
| Cultivar/Umbria | Frantoio                      |
| Cultivar/Umbria | Gentile di Anghiari           |
| Cultivar/Umbria | Gentile di Montone            |
| Cultivar/Umbria | Gnagolo                       |
| Cultivar/Umbria | Grappolo SC U7                |
| Cultivar/Umbria | Ieri Costacciaro              |
| Cultivar/Umbria | Ignota San Mariano            |
| Cultivar/Umbria | Isola Polvere 158             |
| Cultivar/Umbria | Isola polvere 159             |
| Cultivar/Umbria | Isola Polvere 160             |
| Cultivar/Umbria | Isola Polvere 161             |

|                 |                       |
|-----------------|-----------------------|
| Cultivar/Umbria | Isola Polvere 164     |
| Cultivar/Umbria | Leccino               |
| Cultivar/Umbria | Limona                |
| Cultivar/Umbria | Limona di Resina      |
| Cultivar/Umbria | Lunga Santa Chiara    |
| Cultivar/Umbria | Lunga Zocco 2         |
| Cultivar/Umbria | Marchigiana           |
| Cultivar/Umbria | Maremmana             |
| Cultivar/Umbria | Massa Martana 165     |
| Cultivar/Umbria | Monte Colognola       |
| Cultivar/Umbria | Monte Lago            |
| Cultivar/Umbria | Montefalco 119        |
| Cultivar/Umbria | Montefalco 120        |
| Cultivar/Umbria | Montefalco 121        |
| Cultivar/Umbria | Moraiolo              |
| Cultivar/Umbria | Morcona 79            |
| Cultivar/Umbria | Nebbia                |
| Cultivar/Umbria | Nogna 131             |
| Cultivar/Umbria | Nostrale di Rigali    |
| Cultivar/Umbria | Olivo del Carmine 138 |
| Cultivar/Umbria | Paciano 157           |
| Cultivar/Umbria | Panicate 155          |

|                 |                           |
|-----------------|---------------------------|
| Cultivar/Umbria | Pendolino Rocca Minore U6 |
| Cultivar/Umbria | Peperella                 |
| Cultivar/Umbria | Pocciolo                  |
| Cultivar/Umbria | Pocciolo Frutto Piccolo A |
| Cultivar/Umbria | Pocciolo Frutto Piccolo B |
| Cultivar/Umbria | Raia                      |
| Cultivar/Umbria | Raio                      |
| Cultivar/Umbria | Rastellina                |
| Cultivar/Umbria | Rastellina 166            |
| Cultivar/Umbria | Rosciola                  |
| Cultivar/Umbria | Rosciola 2 Trasimeno      |
| Cultivar/Umbria | Rosciola Umbra            |
| Cultivar/Umbria | Rosciola Zocco            |
| Cultivar/Umbria | Rosciolo Lago             |
| Cultivar/Umbria | Rossellino                |
| Cultivar/Umbria | San Felice                |
| Cultivar/Umbria | San Mariano 116           |
| Cultivar/Umbria | San Mariano 117           |
| Cultivar/Umbria | San Vito Alto 101         |
| Cultivar/Umbria | San Vito Alto 102         |
| Cultivar/Umbria | San Vito Alto 103         |
| Cultivar/Umbria | San Vito Basso 123        |

|                           |                      |
|---------------------------|----------------------|
| Cultivar/Umbria           | San Vito Basso 124   |
| Cultivar/Umbria           | Seggianese 169       |
| Cultivar/Umbria           | Sirole A             |
| Cultivar/Umbria           | Sirole B             |
| Cultivar/Umbria           | Tendellone           |
| Cultivar/Umbria           | Tonda di Assisi U5   |
| Cultivar/Umbria           | Tonda Nera           |
| Cultivar/Umbria           | Vera Lago            |
| Cultivar/Umbria           | Verde Zocco          |
| Cultivar/Umbria           | Vigorosa             |
| Cultivar/Umbria           | Villa Col de' Canali |
| Cultivar/Umbria           | Vocio                |
| Cultivar/Umbria           | VSFCC16b             |
| Cultivar/Umbria           | Zocco 101            |
| Cultivar/Umbria           | Zocco 201            |
| Cultivar/Umbria           | Zocco 501            |
| Cultivar (Ancient)/Umbria | Antica Cesi 170 1D   |
| Cultivar (Ancient)/Umbria | Antica Cesi 170 1U   |
| Cultivar (Ancient)/Umbria | Antica Cesi 170 2D   |
| Cultivar (Ancient)/Umbria | Antica Cesi 170 2U   |
| Cultivar (Ancient)/Umbria | Madonna Olivo 172    |
| Cultivar (Ancient)/Umbria | Madonna Olivo 173    |

|                           |                             |
|---------------------------|-----------------------------|
| Cultivar (Ancient)/Umbria | Madonna Olivo 174           |
| Cultivar (Ancient)/Umbria | Madonna Olivo 175           |
| Cultivar (Ancient)/Umbria | Madonna Olivo 176           |
| Cultivar (Ancient)/Umbria | Millenaria Villastrada S1U  |
| Cultivar (Ancient)/Umbria | Millenaria Villastrada S2D  |
| Cultivar (Ancient)/Umbria | Millenaria Villastrada VS1D |
| Cultivar (Ancient)/Umbria | Piedimonte 171              |
| Cultivar (Ancient)/Umbria | Sant'Emiliano               |
| Wild/Umbria/Terni         | Rocca San Zenone 2          |
| Wild/Umbria/Terni         | Rocca San Zenone 3          |
| Wild/Umbria/Terni         | Rocca San Zenone 4          |
| Wild/Umbria/Terni         | Rocca San Zenone 5          |
| Wild/Umbria/Terni         | Rocca San Zenone 6          |
| Wild/Umbria/Terni         | Rocca San Zenone 8          |
| Wild/Umbria/Terni         | Rocca San Zenone 9          |
| Wild/Umbria/Terni         | Rocca San Zenone 10         |
| Wild/Umbria/Terni         | Rocca San Zenone 11         |
| Wild/Umbria/Terni         | Rocca San Zenone 12         |
| Wild/Umbria/Terni         | Rocca San Zenone 13         |
| Wild/Umbria/Massa Martana | Massa Martana 2             |
| Wild/Umbria/Massa Martana | Massa Martana 3             |
| Wild/Umbria/Massa Martana | Massa Martana 5             |

|                           |                  |
|---------------------------|------------------|
| Wild/Umbria/Massa Martana | Massa Martana 6  |
| Wild/Umbria/Massa Martana | Massa Martana 7  |
| Wild/Umbria/Massa Martana | Massa Martana 8  |
| Wild/Umbria/Massa Martana | Massa Martana 9  |
| Wild/Umbria/Massa Martana | Massa Martana 11 |
| Wild/Umbria/Massa Martana | Massa Martana 12 |
| Wild/Umbria/Massa Martana | Massa Martana 13 |
| Wild/Umbria/Massa Martana | Massa Martana 14 |
| Cultivar/Sardinia         | Bosana           |
| Cultivar/Sardinia         | Cariasina        |
| Cultivar/Sardinia         | Confetto         |
| Cultivar/Sardinia         | Corsicana Mensa  |
| Cultivar/Sardinia         | Corsicana Olio   |
| Cultivar/Sardinia         | Manna            |
| Cultivar/Sardinia         | Majorca          |
| Cultivar/Sardinia         | Nera di Gonnos   |
| Cultivar/Sardinia         | Nera di Oliena   |
| Cultivar/Sardinia         | Ogliastrino      |
| Cultivar/Sardinia         | Olieddu          |
| Cultivar/Sardinia         | Olia Nuxi        |
| Cultivar/Sardinia         | Olia Druci       |
| Cultivar/Sardinia         | Olia Longa       |

|                             |                     |
|-----------------------------|---------------------|
| Cultivar/Sardinia           | Palma               |
| Cultivar/Sardinia           | Pezze Quaddu        |
| Cultivar/Sardinia           | Pizz' e Carroga     |
| Cultivar/Sardinia           | Sassarese           |
| Cultivar/Sardinia           | Semidana            |
| Cultivar/Sardinia           | Sivigliana Mensa    |
| Cultivar/Sardinia           | Sivigliana Olio     |
| Cultivar/Sardinia           | Terza Grande        |
| Cultivar/Sardinia           | Tonda di Cagliari   |
| Cultivar/Sardinia           | Tonda di Villacidro |
| Cultivar (Ancient)/Sardinia | Gallura 1           |
| Cultivar (Ancient)/Sardinia | Gallura 2           |
| Cultivar (Ancient)/Sardinia | Gallura 3           |
| Cultivar (Ancient)/Sardinia | Sortu Manna 1       |
| Cultivar (Ancient)/Sardinia | Sortu Manna 2       |
| Cultivar (Ancient)/Sardinia | Sortu Manna 3       |
| Cultivar (Ancient)/Sardinia | Sortu Manna 4       |
| Cultivar (Ancient)/Sardinia | Sortu Manna 5       |
| Wild/Sardinia/Argentiera    | Argentiera 1        |
| Wild/Sardinia/Argentiera    | Argentiera 2        |
| Wild/Sardinia/Argentiera    | Argentiera 3        |
| Wild/Sardinia/Argentiera    | Argentiera 4        |



|                             |                |
|-----------------------------|----------------|
| Wild/Sardinia/Argentiera    | Argentiera 5   |
| Wild/Sardinia/Baia Sardinia | Baia Sardinia1 |
| Wild/Sardinia/Baia Sardinia | Baia Sardinia2 |
| Wild/Sardinia/Baia Sardinia | Baia Sardinia3 |
| Wild/Sardinia/Baia Sardinia | Baia Sardinia4 |
| Wild/Sardinia/Baia Sardinia | Baia Sardinia5 |
| Wild/Sardinia/Capoterra     | Capoterra 40   |
| Wild/Sardinia/Capoterra     | Capoterra 41   |
| Wild/Sardinia/Capoterra     | Capoterra 42   |
| Wild/Sardinia/Capoterra     | Capoterra 43   |
| Wild/Sardinia/Capoterra     | Capoterra 44   |
| Wild/Sardinia/Capoterra     | Capoterra 45   |
| Wild/Sardinia/Capoterra     | Capoterra 46   |
| Wild/Sardinia/Paulilatino   | Paulilatino 1  |
| Wild/Sardinia/Paulilatino   | Paulilatino 2  |
| Wild/Sardinia/Paulilatino   | Paulilatino 3  |
| Wild/Sardinia/Paulilatino   | Paulilatino 4  |
| Wild/Sardinia/Paulilatino   | Paulilatino 40 |
| Wild/Sardinia/Paulilatino   | Paulilatino 41 |
| Wild/Sardinia/Paulilatino   | Paulilatino 42 |
| Wild/Sardinia/Paulilatino   | Paulilatino 43 |
| Wild/Sardinia/Paulilatino   | Paulilatino 44 |

|                           |                               |
|---------------------------|-------------------------------|
| Wild/Sardinia/Paulilatino | Paulilatino 45                |
| Wild/Sardinia/Paulilatino | Paulilatino 46                |
| Wild/Sardinia/Paulilatino | Paulilatino 47                |
| Wild/Sardinia/Paulilatino | Paulilatino 48                |
| Wild/Sardinia/Paulilatino | Paulilatino 49                |
| Wild/Sardinia/Paulilatino | Paulilatino 5                 |
| Wild/Sardinia/Paulilatino | Paulilatino 6                 |
| Wild/Sardinia/Porto Cervo | Porto Cervo 1                 |
| Wild/Sardinia/Porto Cervo | Porto Cervo 2                 |
| Wild/Sardinia/Porto Cervo | Porto Cervo 3                 |
| Wild/Sardinia/Porto Cervo | Porto Cervo 4                 |
| Cultivar/Sicily           | Abunara                       |
| Cultivar/Sicily           | Aitana                        |
| Cultivar/Sicily           | Bancolilla Caltabellotta      |
| Cultivar/Sicily           | Biancolilla Frutto Grosso CT  |
| Cultivar/Sicily           | Biancolilla Frutto Piccolo CT |
| Cultivar/Sicily           | Biancolilla Napoletana        |
| Cultivar/Sicily           | Biancolilla Scillato          |
| Cultivar/Sicily           | Biancolilla Siracusana        |
| Cultivar/Sicily           | Biancollila Pantelleria       |
| Cultivar/Sicily           | Bottone di Gallo              |
| Cultivar/Sicily           | Brandofino                    |

|                 |                         |
|-----------------|-------------------------|
| Cultivar/Sicily | Carbucia                |
| Cultivar/Sicily | Castriciana             |
| Cultivar/Sicily | Castricianella          |
| Cultivar/Sicily | Cavalieri               |
| Cultivar/Sicily | Erbano                  |
| Cultivar/Sicily | Galatina                |
| Cultivar/Sicily | Giarfara                |
| Cultivar/Sicily | Giarraffa               |
| Cultivar/Sicily | Giarraffa Castronovo    |
| Cultivar/Sicily | Lumiaro                 |
| Cultivar/Sicily | Mantonica               |
| Cultivar/Sicily | Minuta                  |
| Cultivar/Sicily | Moresca                 |
| Cultivar/Sicily | Morghigna               |
| Cultivar/Sicily | Nasitana frutto grosso  |
| Cultivar/Sicily | Nerba                   |
| Cultivar/Sicily | Nocellara del Belice    |
| Cultivar/Sicily | Nocellara del Belice CM |
| Cultivar/Sicily | Nocellara del Belice GP |
| Cultivar/Sicily | Nocellara Etneor        |
| Cultivar/Sicily | Nocellara Messinese     |
| Cultivar/Sicily | Ogliarola Messinese     |

|                           |                    |
|---------------------------|--------------------|
| Cultivar/Sicily           | Olivo di Mandanici |
| Cultivar/Sicily           | Palermitana        |
| Cultivar/Sicily           | Passalunara        |
| Cultivar/Sicily           | Piricuddara        |
| Cultivar/Sicily           | Santagatese        |
| Cultivar/Sicily           | Tondaiblea         |
| Cultivar/Sicily           | Turdunazza 16      |
| Cultivar/Sicily           | Turdunazza am 15   |
| Cultivar/Sicily           | Zaituna            |
| Cultivar (Ancient)/Sicily | Agrigento 1        |
| Cultivar (Ancient)/Sicily | Agrigento 2        |
| Cultivar (Ancient)/Sicily | Castelvetrano 1    |
| Cultivar (Ancient)/Sicily | Minuta Nebrodi 1   |
| Wild/Sicily/Ali Terme     | Ali 1              |
| Wild/Sicily/Ali Terme     | Ali 10             |
| Wild/Sicily/Ali Terme     | Ali 11             |
| Wild/Sicily/Ali Terme     | Ali 12             |
| Wild/Sicily/Ali Terme     | Ali 2              |
| Wild/Sicily/Ali Terme     | Ali 3              |
| Wild/Sicily/Ali Terme     | Ali 4              |
| Wild/Sicily/Ali Terme     | Ali 5              |
| Wild/Sicily/Ali Terme     | Ali 6              |

|                       |                   |
|-----------------------|-------------------|
| Wild/Sicily/Ali Terme | Ali 7             |
| Wild/Sicily/Ali Terme | Ali 8             |
| Wild/Sicily/Ali Terme | Ali 9             |
| Wild/Sicily/Menfi     | MENFI 1           |
| Wild/Sicily/Menfi     | MENFI 10          |
| Wild/Sicily/Menfi     | MENFI 11          |
| Wild/Sicily/Menfi     | MENFI 12          |
| Wild/Sicily/Menfi     | MENFI 13          |
| Wild/Sicily/Menfi     | MENFI 14          |
| Wild/Sicily/Menfi     | MENFI 15          |
| Wild/Sicily/Menfi     | MENFI 16          |
| Wild/Sicily/Menfi     | MENFI 18          |
| Wild/Sicily/Menfi     | MENFI 2           |
| Wild/Sicily/Menfi     | MENFI 3           |
| Wild/Sicily/Menfi     | MENFI 4           |
| Wild/Sicily/Menfi     | MENFI 5           |
| Wild/Sicily/Menfi     | MENFI 6           |
| Wild/Sicily/Menfi     | MENFI 7           |
| Wild/Sicily/Menfi     | MENFI 8           |
| Wild/Sicily/Menfi     | MENFI 9           |
| Wild/Sicily/Rosolini  | Rosolini Compat 2 |
| Wild/Sicily/Rosolini  | Rosolini OAFR 5   |

|                      |                   |
|----------------------|-------------------|
| Wild/Sicily/Rosolini | Rosolini RIF 3    |
| Wild/Sicily/Rosolini | Rosolini Varieg 4 |
| Wild/Sicily/Rosolini | A1 PMBL11         |
| Wild/Sicily/Rosolini | A2 AD12           |
| Wild/Sicily/Rosolini | A3 AD13           |
| Wild/Sicily/Rosolini | A4 AD14           |
| Wild/Sicily/Rosolini | AFCAA 21          |
| Wild/Sicily/Rosolini | AFCAB 22          |
| Wild/Sicily/Rosolini | AFCAC 23          |
| Wild/Sicily/Rosolini | AFCAD 24          |

---
